# Supplementary material for: DNABINDPROT: fluctuation-based predictor of DNA-binding residues within a network of interacting residues
Source: PubMed Central journal article supplement — Nucleic Acids Res. 2010 May 16;38(Web Server issue):W417–23. doi: 10.1093/nar/gkq396 (PMC2896127; doi:10.1093/nar/gkq396), 2010-05-16
Supplement: gkq396_1.pdf [file gkq396_1.pdf]

**Supplementary Table S1. Dataset**

| <b>Complex PDB ID</b> | <b>Unbound PDB ID</b> | <b>Protein chain ID</b> |
|-----------------------|-----------------------|-------------------------|
| 10mh                  | 1hmy                  | A                       |
| 1a73                  | 1evx                  | A                       |
| 1azp                  | 1sap                  | A                       |
| 1bdt                  | 1arq                  | A                       |
| 1cma                  | 1mjk                  | A                       |
| 1diz                  | 1mpg                  | A                       |
| 1e7j                  | 1hma                  | A                       |
| 1emh                  | 1akz                  | A                       |
| 1eyu                  | 1pvu                  | A                       |
| 1f4k                  | 1bm9                  | A                       |
| 1fok                  | 2fok                  | A                       |
| 1g38                  | 1aqj                  | A                       |
| 1g9z                  | 2o7m                  | A                       |
| 1gcc                  | 2gcc                  | A                       |
| 1gfx                  | 1lrp                  | A                       |
| 1gxp                  | 1gxq                  | A                       |
| 1h9t                  | 1e2x                  | A                       |
| 1hjc                  | 1ean                  | A                       |
| 1i6h                  | 1nik                  | B                       |
| 1iaw                  | 1ev7                  | A                       |
| 1ig4                  | 1d9n                  | A                       |
| 1ixy                  | 1bgt                  | A                       |
| 1jj4                  | 1f9f                  | A                       |
| 1jt0                  | 1jus                  | A                       |
| 1k3w                  | 1q39                  | A                       |
| 1k79                  | 1gvj                  | A                       |
| 1ksy                  | 1f08                  | A                       |
| 1mgz                  | 1j53                  | A                       |
| 1mtl                  | 1mug                  | A                       |
| 1mvd                  | 1lea                  | A                       |
| 1pt3                  | 1m08                  | A                       |
| 1qne                  | 1vok                  | A                       |
| 1qrv                  | 1hma                  | A                       |
| 1rh6                  | 1lx8                  | A                       |
| 1rva                  | 1rve                  | A                       |
| 1t39                  | 1eh6                  | A                       |
| 1tro                  | 3wrp                  | A                       |
| 1vas                  | 1eni                  | A                       |
| 1wte                  | 1wtd                  | A                       |
| 1xpx                  | 1mij                  | A                       |
| 1xsd                  | 1sd4                  | A                       |
| 1y6f                  | 1xv5                  | A                       |
| 1z63                  | 1z6a                  | A                       |
| 1z9c                  | 1z91                  | A                       |
| 1zme                  | 1ajy                  | A                       |
| 1zs4                  | 1xwr                  | A                       |
| 2a6o                  | 2a6m                  | A                       |
| 2bzf                  | 1ci4                  | A                       |
| 2cgp                  | 1g6n                  | A                       |
| 2fl3                  | 1ynm                  | A                       |
| 2hdc                  | 2hfh                  | A                       |
| 2irf                  | 1irg                  | A                       |
| 3cro                  | 1zug                  | A                       |
| 3hts                  | 1fbu                  | B                       |
